# Supplementary material for: Two-step leaching of spent lithium-ion batteries and effective regeneration of critical metals and graphitic carbon employing hexuronic acid
Source: Royal Society of Chemistry journal article supplement (doi:10.1039/d2ra07926g), 2023-01-01
Supplement: d2ra07926g1.pdf [file d2ra07926g1.pdf]

**Supporting information for**  
**Two-step leaching of spent lithium-ion batteries and effective regeneration**  
**of critical metals and graphitic carbon employing hexuronic acid**

Sibananda Sahu<sup>a</sup>, Niharbala Devi<sup>a,b,\*</sup>

<sup>a</sup>Biofuels and Bioprocessing Research Center, Institute of Technical Education and Research,  
Siksha 'O' Anusandhan Deemed to be University, Bhubaneswar, Odisha, India

<sup>b</sup>Department of Chemistry, Institute of Technical Education and Research, Siksha 'O'  
Anusandhan Deemed to be University, Bhubaneswar, Odisha, India

\*Corresponding author: [niharbaladevi@soa.ac.in](mailto:niharbaladevi@soa.ac.in)

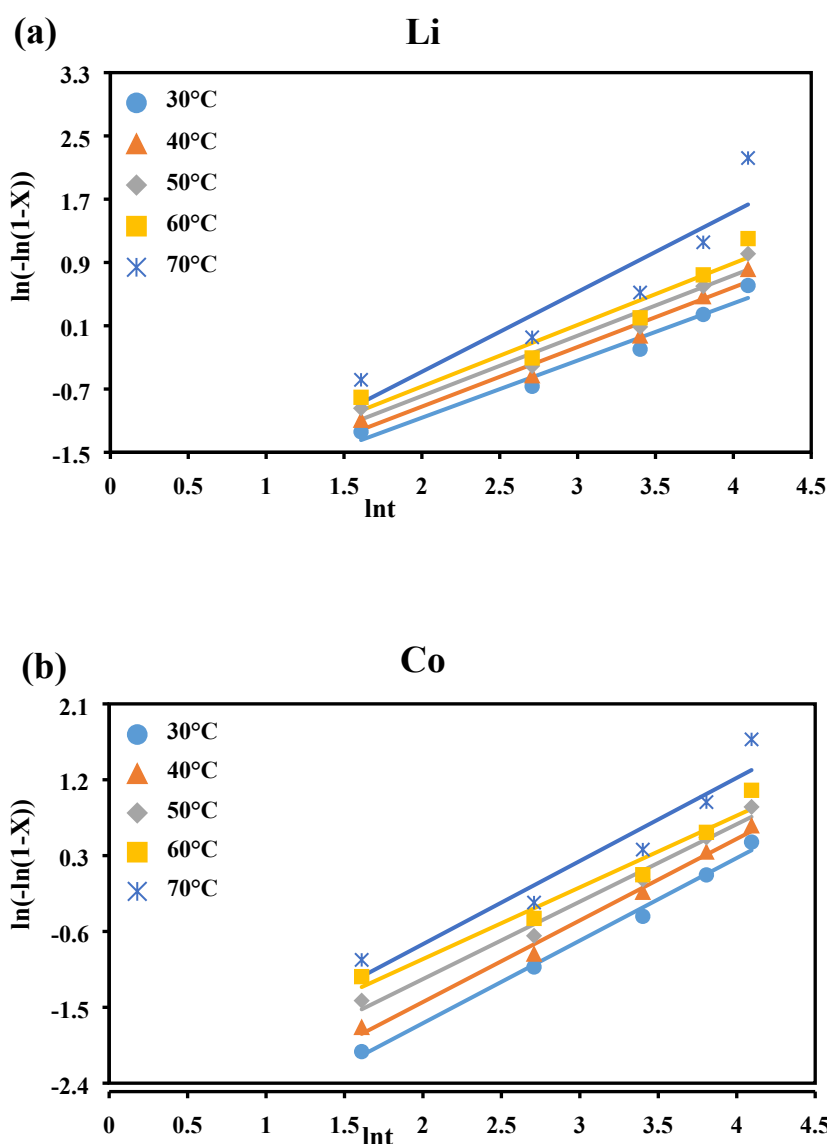

**Fig. S1** Dissolution of Li and Co vs time at different temperatures, fitted by Avrami equation model for leaching of (a) Li and (b) Co.

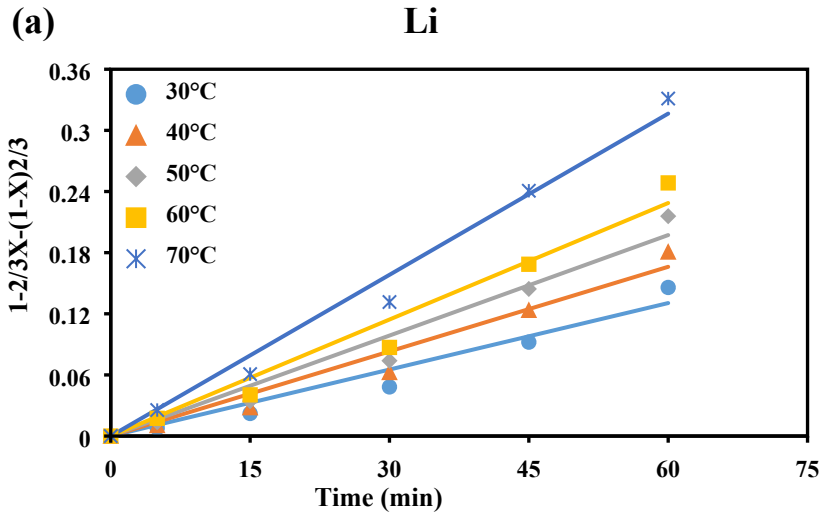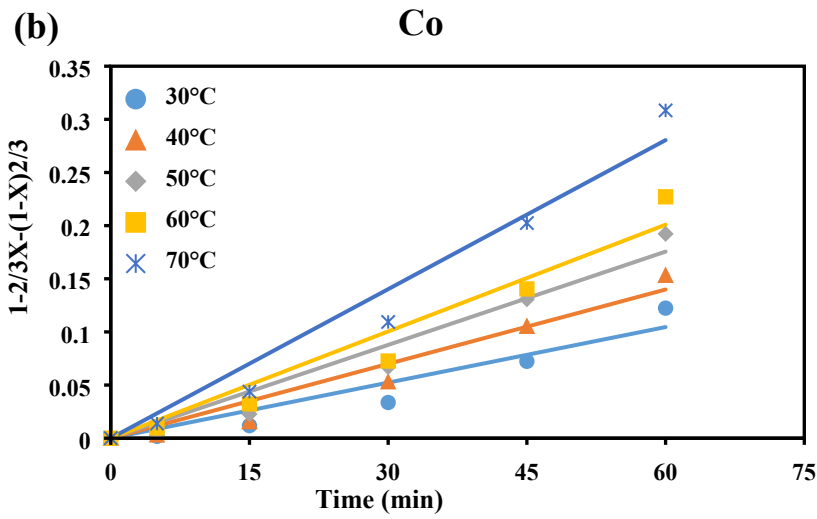

**Fig. S2** Dissolution of Li and Co vs time at different temperatures, fitted by diffusion control through the product layer for leaching of (a) Li and (b) Co.

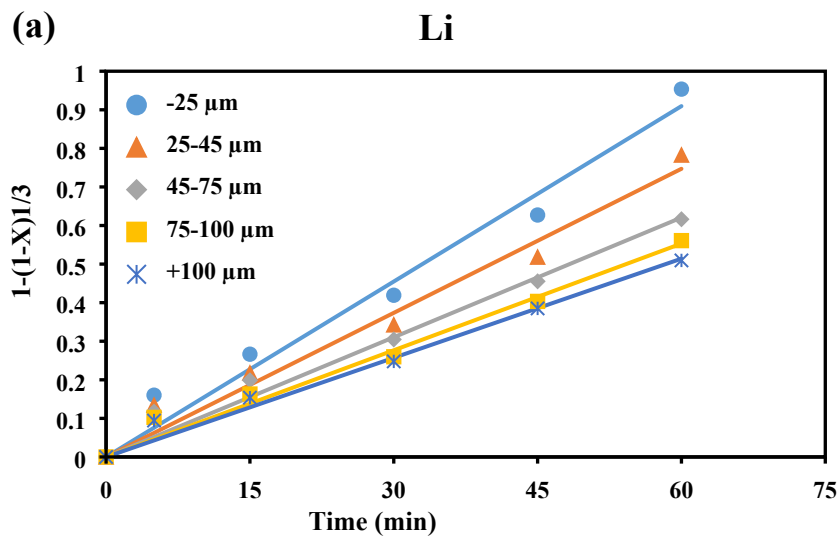

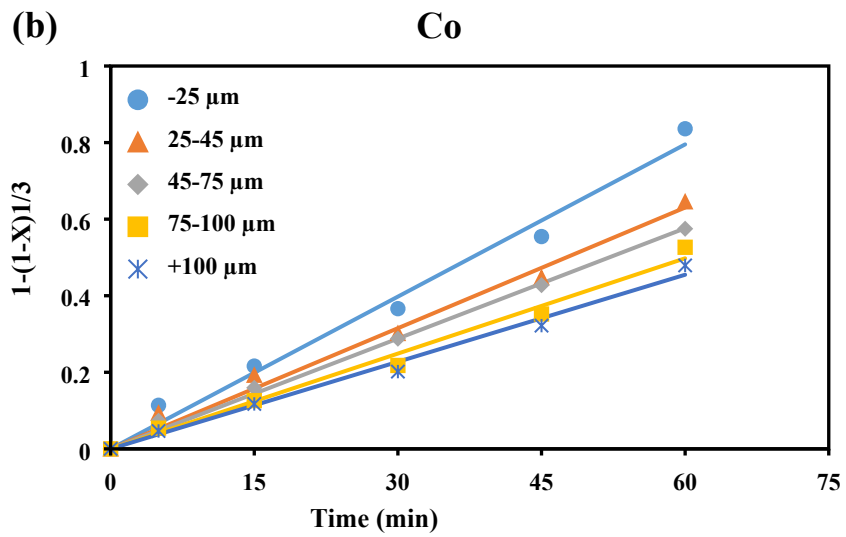

**Fig. S3** Applicability of surface chemical reaction control model for leaching of (a) Li and (b) Co with different particle sizes.
